# Supplementary material for: Effects of perioperative goal-directed fluid therapy combined with the application of alpha-1 adrenergic agonists on postoperative outcomes: a systematic review and meta-analysis
Source: Springer Nature journal article supplement (doi:10.1186/s12871-018-0564-y), 2018-08-17
Supplement: MOESM1 [file 16052086]

**Additional file 1** Search terms and number of articles found from a preliminary PubMed search

| Step | Searching terms                                                                                                                                                                                                                                                                                                                                                                                                                                                                | Articles found (n)* |
|------|--------------------------------------------------------------------------------------------------------------------------------------------------------------------------------------------------------------------------------------------------------------------------------------------------------------------------------------------------------------------------------------------------------------------------------------------------------------------------------|---------------------|
| #1   | ((((((((((("General Surgery"[Mesh]) OR "Surgical Procedures, Operative"[Mesh]) OR "Perioperative Period"[Mesh]) OR "Monitoring, Intraoperative"[Mesh]) OR "Intraoperative Period"[Mesh]) OR "Intraoperative Care"[Mesh]) OR "surgery" [Subheading]) OR surg*) OR intraoperati*) OR perioperati*) OR operati*)) NOT "Cardiac Surgical Procedures"[Mesh]                                                                                                                         | 4007563             |
| #2   | ((((((("Fluid Therapy"[Mesh]) OR ((((((("Body Fluids"[Mesh]) OR "Hemodynamics"[Mesh]) OR fluid*) OR hemodynamic*)) AND ((((((therap*) OR load*) OR administrat*) OR manag*) OR maintain*) OR optimizat*) OR optimisat*)))))) AND (((("Goals"[Mesh]) OR goals) OR goal))) OR GDFT) OR GDHT                                                                                                                                                                                      | 9032                |
| #3   | ((((((((((((((("Randomized Controlled Trials as Topic"[Mesh]) OR "Randomized Controlled Trial" [Publication Type]) OR "Controlled Clinical Trial" [Publication Type]) OR "Controlled Clinical Trials as Topic"[Mesh]) OR "Placebos"[Mesh]) OR "Random Allocation"[Mesh]) OR "Clinical Trial" [Publication Type]) OR "Clinical Trials as Topic"[Mesh]) OR random*) OR trial) OR trials) OR group) OR groups) OR placebo) OR placebos)) NOT (("Animals"[Mesh])NOT"Humans"[Mesh]) | 4269271             |
| #4   | #1 AND #2 AND #3                                                                                                                                                                                                                                                                                                                                                                                                                                                               | 815                 |

\*Preliminary search conducted on 1 March 2018 at 08:20:50.

MeSH, Medical Subject Heading; tiab, title abstract text.
