# Supplementary material for: Effects of perioperative goal-directed fluid therapy combined with the application of alpha-1 adrenergic agonists on postoperative outcomes: a systematic review and meta-analysis
Source: Springer Nature journal article supplement (doi:10.1186/s12871-018-0564-y), 2018-08-17
Supplement: MOESM2 [file 16052086]

|                              | Random sequence generation (selection bias) | Allocation concealment (selection bias) | Blinding of participants and personnel (performance bias) | Blinding of outcome assessment (detection bias) | Incomplete outcome data (attrition bias) | Selective reporting (reporting bias) | Other bias |
|------------------------------|---------------------------------------------|-----------------------------------------|-----------------------------------------------------------|-------------------------------------------------|------------------------------------------|--------------------------------------|------------|
| Bartha et al., 2013          | +                                           | +                                       | -                                                         | -                                               | +                                        | +                                    | +          |
| Benes et al., 2015           | +                                           | +                                       | +                                                         | +                                               | +                                        | ?                                    | +          |
| Bisgaard, et al., 2013       | +                                           | ?                                       | +                                                         | +                                               | +                                        | +                                    | ?          |
| Broch et al., 2016           | +                                           | ?                                       | ?                                                         | ?                                               | +                                        | +                                    | +          |
| Elgendy et al., 2017         | +                                           | +                                       | +                                                         | +                                               | +                                        | +                                    | ?          |
| Forget et al., 2010          | +                                           | ?                                       | ?                                                         | +                                               | +                                        | +                                    | +          |
| Funk et al., 2015            | +                                           | +                                       | ?                                                         | +                                               | +                                        | +                                    | +          |
| Gan et al., 2002             | +                                           | +                                       | -                                                         | +                                               | +                                        | +                                    | +          |
| Gómez-Izquierdo et al., 2017 | +                                           | +                                       | +                                                         | +                                               | +                                        | +                                    | +          |
| Hand et al., 2016            | +                                           | ?                                       | -                                                         | -                                               | ?                                        | +                                    | +          |
| Kaufmann et al., 2017        | +                                           | +                                       | +                                                         | +                                               | +                                        | +                                    | +          |
| Kumar et al., 2015           | +                                           | ?                                       | ?                                                         | ?                                               | +                                        | ?                                    | ?          |
| Luo et al., 2017             | +                                           | +                                       | ?                                                         | ?                                               | +                                        | +                                    | +          |
| Malbouisson et al., 2017     | -                                           | ?                                       | -                                                         | ?                                               | +                                        | +                                    | ?          |
| Mayer et al., 2010           | +                                           | +                                       | +                                                         | +                                               | +                                        | +                                    | +          |
| Moppett et al., 2015         | +                                           | +                                       | -                                                         | +                                               | +                                        | +                                    | +          |
| Peng et al., 2014            | +                                           | +                                       | -                                                         | +                                               | +                                        | ?                                    | ?          |
| Pestaña et al., 2014         | +                                           | +                                       | +                                                         | +                                               | +                                        | +                                    | +          |
| Pösö et al., 2014            | ?                                           | ?                                       | -                                                         | -                                               | +                                        | +                                    | +          |
| Reisinger et al., 2017       | +                                           | ?                                       | +                                                         | +                                               | +                                        | +                                    | ?          |
| Salzwedel et al., 2013       | +                                           | +                                       | -                                                         | -                                               | +                                        | +                                    | +          |
| Scheeren et al., 2013        | +                                           | +                                       | -                                                         | +                                               | +                                        | ?                                    | ?          |
| Schmid et al., 2016          | +                                           | ?                                       | +                                                         | +                                               | +                                        | +                                    | +          |
| Stens et al., 2017           | +                                           | +                                       | +                                                         | +                                               | +                                        | +                                    | +          |
| Veelo et al., 2017           | ?                                           | ?                                       | ?                                                         | ?                                               | +                                        | +                                    | ?          |
| wagar et al., 2017           | ?                                           | ?                                       | ?                                                         | ?                                               | +                                        | +                                    | +          |
| Weinberg et al., 2017        | +                                           | +                                       | +                                                         | +                                               | +                                        | ?                                    | +          |
| Wu et al., 2017              | +                                           | +                                       | +                                                         | +                                               | +                                        | ?                                    | ?          |
| Xu et al., 2017              | +                                           | +                                       | +                                                         | +                                               | +                                        | +                                    | ?          |
| Zhang et al., 2013           | +                                           | +                                       | ?                                                         | ?                                               | +                                        | +                                    | ?          |
| Zheng et al., 2013           | +                                           | +                                       | ?                                                         | +                                               | ?                                        | +                                    | +          |
