# Supplementary material for: Effects of perioperative goal-directed fluid therapy combined with the application of alpha-1 adrenergic agonists on postoperative outcomes: a systematic review and meta-analysis
Source: Springer Nature journal article supplement (doi:10.1186/s12871-018-0564-y), 2018-08-17

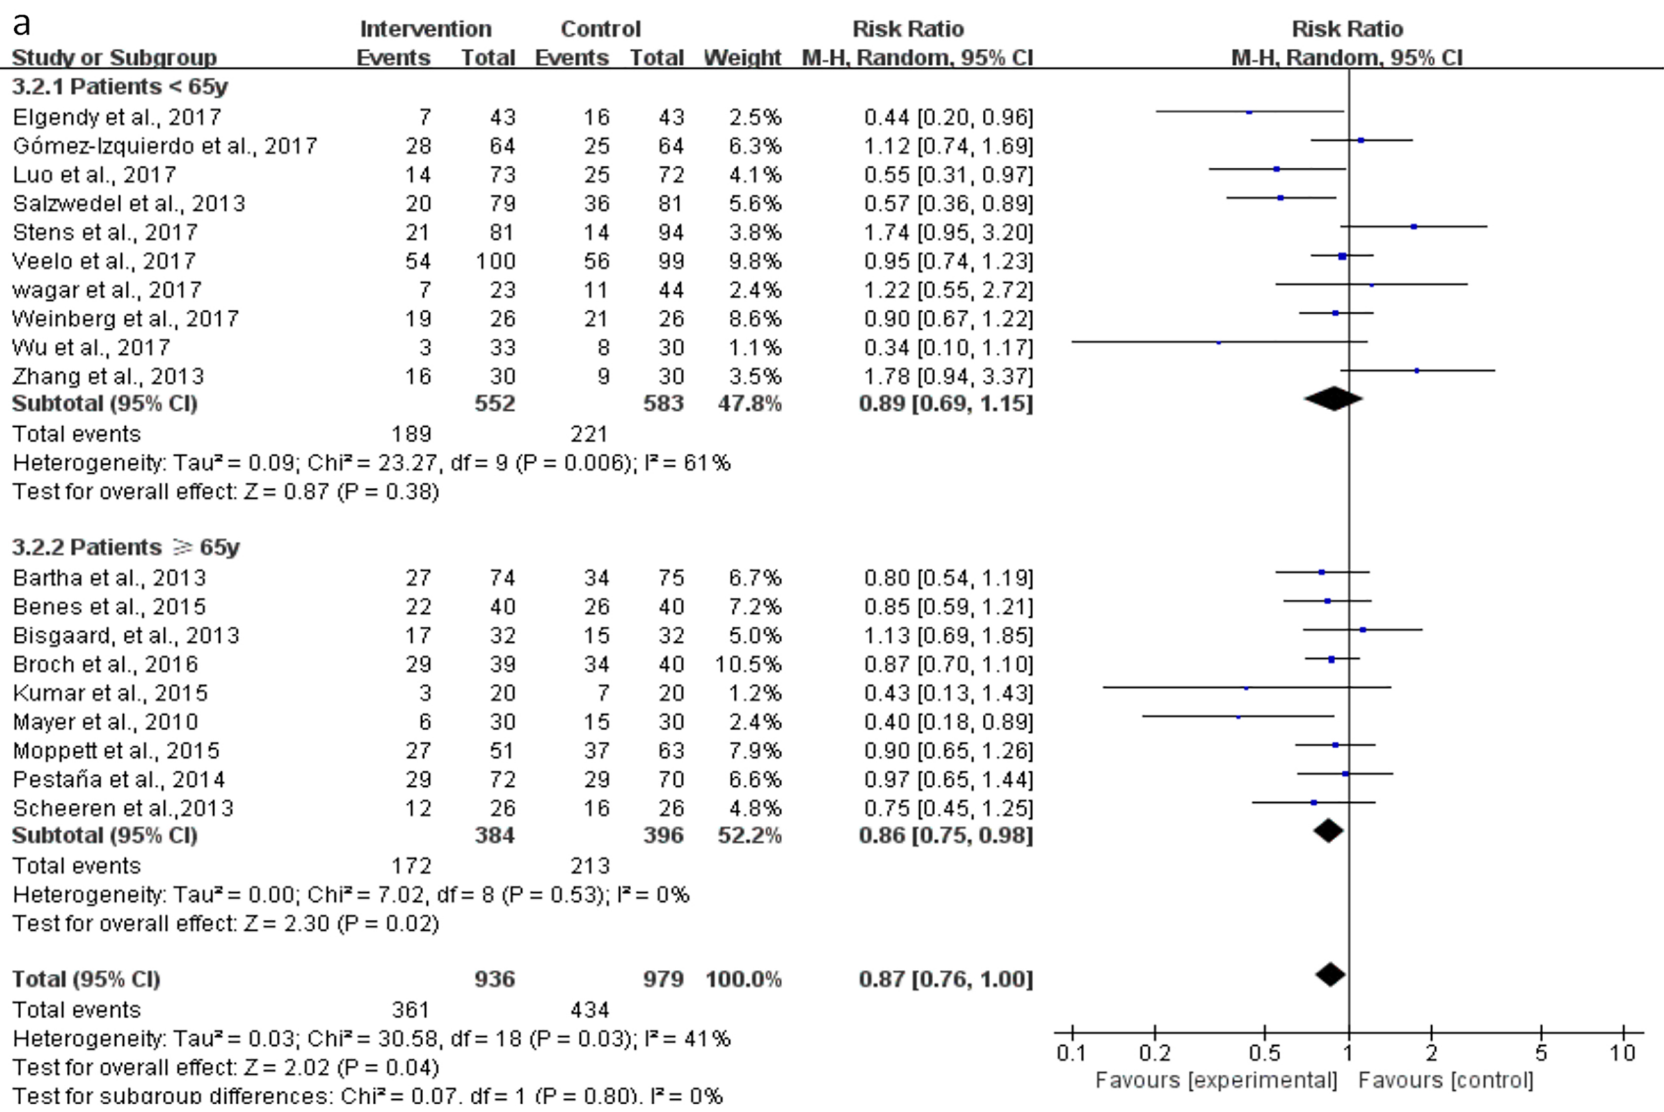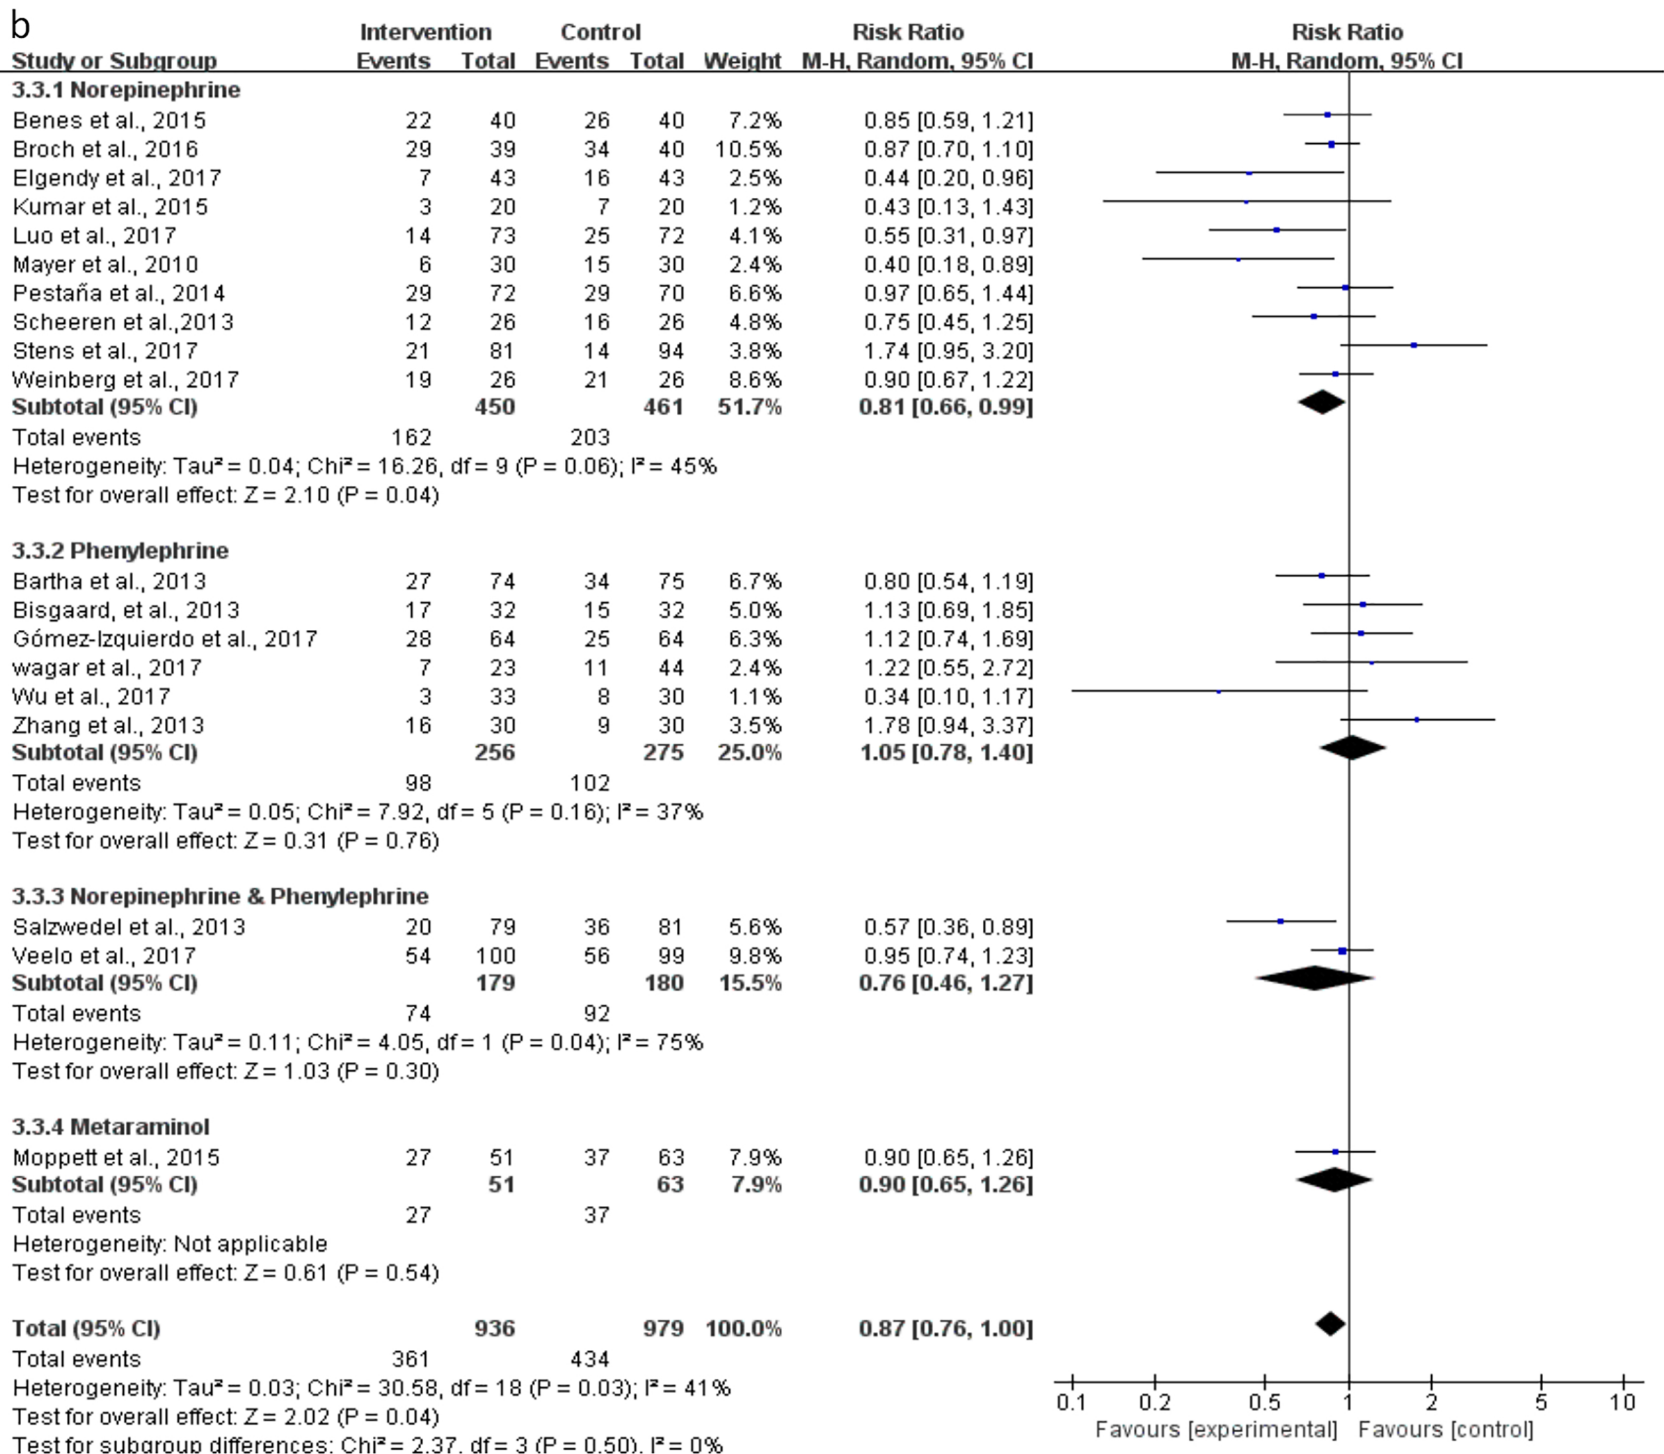

Supplement: MOESM10 [file 16052086]
